# Supplementary material for: Correlations Between Lung Pneumonic Lesions and Serologic Status to Key Respiratory Pathogens in Slaughtered Pigs in Northern Uganda
Source: Research Square preprint supplement (doi:10.21203/rs.3.rs-564451/v1), 2021-06-03
Supplement: Supplementary file 1 [file 944fa4eadcf83e7da6922126.docx]

**RELEVANT STROBE-VET RECOMMENDATIONS CHECKLIST(S)**

[**https://strobevetstatement.files.wordpress.com/2016/09/strobe-vet-checklist.pdf**](https://strobevetstatement.files.wordpress.com/2016/09/strobe-vet-checklist.pdf)

| **Section** | **Item no.** | **STROBE Recommendation** | **Page no.** |
| --- | --- | --- | --- |
| Title and Abstract | 1 | Study was an analytical cross sectional; reason why it was conducted, the results and the relevance of the findings mentioned | 1-2 |
| Background / rationale | 2 | Scientific background and rationale for the investigation being reported stated | 2-3 |
| Objectives | 3 | Specific objectives stated in the background | 3 |
| Study design | 4 | Described in materials and methods sub section | 3 |
| Setting | 5 | Study setting: location and relevant dates, including periods of recruitment and data collection in materials and methods described | 3 |
| Research participants/ subjects | 6 | Selection/eligibility criteria for the owners/farms and for the pigs, at each relevant level of organization (subcounty, parishes and villages) described in materials and methods | 3-6 |
| Variables | 7 | Outcome variables, predictors & potential confounders stated | 4 |
| Data sources / measurement | 8 | Data sources and details of methods of measurement described | 4-6 |
| Bias | 9 | Efforts to address potential sources of bias due to confounding, selection, or information bias stated in the study design | 3 |
| Study size | 10 | Method for sample size determination stated in materials and methods | 4 |
| Quantitative variables | 11 | Measurement of pig live weights mentioned; method of scoring for pneumonia types described | 3 |
| Statistical methods | 12 | Statistical methods for each objective described in detail; methods to control for confounding stated. How missing data was handled is stated | 6 |
| Participants | 13 | Numbers of animals (pigs) by slaughter slab stated | 7 |
| Exposures and potential confounders | 14 | Characteristics of study participants (farms, pigs); information on exposures and potential confounders by group and level of organization stated | 7-10 |
| Outcome data | 15 | Report of outcomes for the study design and a summary of all relevant levels of organization shown in results section | 7-10 |
| Main results | 16 | Adjusted estimates for prevalence and their precision (95% confidence interval) stated. Confounders and interactions (*Metastrongylus spp)* adjusted. Relevant parameters in the models reported | 7-8 |
| Other analyses | 17 | None | - |
| Key results | 18 | Summary of key results with reference to study objectives indicated | 7-10 |
| Strengths and Limitations | 19 | Strengths and limitations of the study, sources of potential bias or imprecision stated. | 12-13 |
| Interpretation | 20 | Overall interpretation of results considering objectives and comparison with other studies stated in the discussion | 10-12 |
| Generalizability | 21 | External validity of the study results stated in the discussion | 10-13 |
| Funding Transparency | 22 | Funding source and the role of the funders for the present study stated; conflicts of interest statement provided  Roles of authors in the study stated; authors’ declaration of transparency is provided  Ethical approvals provided for use of animals in research stated. Quality standards in the conduct of the research were followed as per ILRI’s research policy | 13-14 |
